# Supplementary material for: Synthetic biology tools for programming gene expression without nutritional perturbations in Saccharomyces cerevisiae
Source: PubMed Central journal article supplement (PMC3973312; doi:10.1093/nar/gkt1402), 2014-01-20
Supplement: supp_gkt1402_nar-03167-met-g-2013-File007.pdf [file supp_gkt1402_nar-03167-met-g-2013-File007.pdf]

## **Supplementary Information**

### **Synthetic Biology Tools for Programming Gene Expression Without Nutritional Perturbations in *Saccharomyces cerevisiae***

R. Scott McIsaac<sup>1,2,4,\*</sup>, Patrick A. Gibney<sup>1</sup>, Sunil S. Chandran<sup>2</sup>, Kirsten Benjamin<sup>2</sup>, David Botstein<sup>1,3,\*</sup>  
<sup>1</sup>The Lewis-Sigler Institute for Integrative Genomics, Princeton University, Princeton, NJ 08544, USA.  
<sup>2</sup>Amyris, Inc, Emeryville, CA 94608, USA

<sup>3</sup>Department of Molecular Biology, Princeton University, Princeton, NJ 08544, USA.

<sup>4</sup>Division of Chemistry and Chemical Engineering, California Institute of Technology, Pasadena, CA 91125, USA.

\*To whom correspondence should be addressed:

[r.scott.mcisaac@gmail.com](mailto:r.scott.mcisaac@gmail.com), [botstein@genomics.princeton.edu](mailto:botstein@genomics.princeton.edu)

Sequences of promoters for Z<sub>3</sub>EV targeting used in main text with Zif268 binding elements highlighted:

>P1

ttatattgaattttcaaaaattcttactttttttggatggacgcaaagaagttaataatcatattacatggcattaccaccatata  
catatccatatctaacttacttatatgttggaaatgtaaagagccccattatcttagcctaataaaaaccttctcttggaaactt  
tcagtaatacgcttaactgctcattgctatattgaagtgcggccgctgggctgctgggctggctgggctggctggg  
cgggcgtgggctgctgggctgcttagaccgtgctcctcgtctcaccggctcgttctgaaacgcagatgtgcctcgc  
gccgactgctccgaacaataaagattctacaactagctttatggtatgaagaggaaaaattggcagtaacctggcc  
ccacaaacctcaaatcaaatcaaatcaaatcaaatcaaatcaaatcaaatcaaatcaaatcaaatcaaatcaaatcaaat  
aatcagcgaagcgtatgtttgatctattaacagatatataatggaaaagctgcataaccactttaactaatactttcaaca  
tttcagttgtattacttctattcaaatgcatataaaagtatcaacaaaaattgtaataatcttatactttaacgtcaaggag  
aaaaactata

>P2

gctgggctgccaattggtgctgggctgccaattggtgctgggctgccaattggtgctgggctgccaattggtgctgggctg  
gccgtgctcctcgtctcaccggctcgttctgaaacgcagatgtgcctaacaataaagattctacaactagctttatg  
ggtatgaagaggaaaaattggcagtaacctggccccacaaacctcaaatcaaatcaaatcaaatcaaatcaaatcaaat  
ataatgctgattagtttttagccttattctgggtaattaatcagcgaagcgtatgtttgatctattaacagatatataatgga  
aaagctgcataaccactttaactaatactttcaacattttcagttgtattacttctattcaaatgcatataaaagtatcaacaaa  
aattgtaataatcttatactttaacgtcaaggagaaaaactata

>P3

ttatattgaattttcaaaaattcttactttttttggatggacgcaaagaagttaataatcatattacatggcattaccaccatata  
catatccatatctaacttacttatatgttggaaatgtaaagagccccattatcttagcctaataaaaacctgctgggctct  
cttggaaacttcagtaatacgcttggctgggctgactgctcattgctatattgaagtcgctcctcgtctcaccggctcgc  
gttctgaaacgcagatgtgcctaacaataaagattctagctgggctgcaactagctttatggtatgagctgggctgca  
gaggaaaaattggcagtaaccgctgggctgccccacaaacctcaaatcaaatcaaatcaaatcaaatcaaatcaaatcaaat  
accataggatgataatgctgattagtttttagccttattctgggtaattaatcagcgaagcgtatgtttgatctattaacaga  
tatataaatggaaaagctgcataaccactttaactaatactttcaacattttcagttgtattacttctattcaaatgcatataaa  
tatcaacaaaaattgtaataatcttatactttaacgtcaaggagaaaaactata

>P4

ttatattgaattttcaaaaattcttactttttttggatggacgcaaagaagttaataatcatattacatggcattaccaccatata  
catatccatatctaacttacttatatgttggaaatgtaaagagccccattatcttagcctaataaaaaccttctcttggaaactt  
tcagtaatacgcttaactgctcattgctatattgaagtcgctcctcgtctcaccggctcgttctgaaacgcagatgtg  
cctaacaataaagattctacaactagctttatggtatgaagaggaaaaattggcagtaacctggccccacaaaccttc  
aaataacgaatcaaatcaaatcaaatcaaatcaaatcaaatcaaatcaaatcaaatcaaatcaaatcaaatcaaatcaaat  
gctgggctgcttagacaacctaggatgataatgctgattagtttttagccttattctgggtaattaatcagcgaagcgtatgt  
ttgatctattaacagatatataatggaaaagctgcataaccactttaactaatactttcaacattttcagttgtattacttctatt  
caaatgcatataaaagtatcaacaaaaattgtaataatcttatactttaacgtcaaggagaaaaactata

>P5

ttatattgaattttcaaaaattcttactttttttggatggacgcaaagaagttaataatcatattacatggcattaccaccatata  
catatccatatctaacttacttatatgttggaaatgtaaagagccccattatcttagcctaataaaaaccttctcttggaaactt  
tcagtaatacgcttaactgctcattgctatattgaagtgcggccgctgggctgctgggctggctgggctggctgggctggc  
gtgggctgcttagacaacctaggatgataatgctgattagtttttagccttattctgggtaattaatcagcgaagcgtatgt  
ttgatctattaacagatatataatggaaaagctgcataaccactttaactaatactttcaacattttcagttgtattacttctatt  
caaatgcatataaaagtatcaacaaaaattgtaataatcttatactttaacgtcaaggagaaaaactata

cgggcgtgggcgcgcgggcgcttagaccgtgctcctcgcttcaccggcgcggtcctgaaacgcagatgtgcctaac  
aataaagattctacaatactagcttttatggtatgaagaggaaaaattggcagtaacctggccccacaaacctcaaatta  
acgaatcaaattaacaacataggatgataatgcgattagtttttagccttatttctgggtaattaatcagcgaagcgatga  
ttttgatctattaacagatatataaatggaaaagctataatagatattataacatttttagtacataaaagaggccccgagaaa  
atagatttaactggaataattttgcaag

>P6

ttatattgaatttcaaaaattcttacttttttggatggacgcaaagaagttaataatcatattacatggcattaccacatata  
catatccatatctaacttacttataatgttggaatgtaaagagccccattatcttagcctaaaaaaccttctttggaactt  
tcagtaatacgcttaactgctcattgctatattgaagtgcggccgcgggcgcgcgggcgcgcgggcgcgcgggcgcgcggg  
cgggcgtgggcgcgcgggcgcttagaccgtgctcctcgcttcaccggcgcggtcctgaaacgcagatgtgcctaac  
aataaagattctacaatactagcttttatggtatgaagaggaaaaattggcagtaacctggccccacaaacctcaaatta  
acgaatcaaattaacaacataggatgataatgcgattagtttttagccttatttctgggtaattaatcagcgaagcgatga  
ttttgatctattaacagatatataaatggaaaagctgccaccagcgtatacaatctcgatagttggttcccgttcttccactc  
ccgtc

>P7

gcggtgggcgctcgagcagatccgccaggcgtgtatataagcgtggatggccaggcaactttagtgctgacacatacaggc  
atataatagtgtgacgacacatgatcatatggcatgcatgtgctctgtatgtatataaaactctgttttcttcttctctaaat  
attcttcttatacattaggaccttgcagcataaatactatacttctatagacacacaaacacaaatacacacactaaatta  
ata

>P8

gcggtgggcgcaattggtgcggtgggcgccaattggtgcggtgggcgctcgagcagatccgccaggcgtgtatataagcgtgga  
tggccaggcaactttagtgctgacacatacaggcatatataatagtgtgacgacacatgatcatatggcatgcatgtgct  
ctgtatgtatataaaactctgttttcttcttctctaaatattcttcttatacattaggaccttgcagcataaatactatacttca  
tagacacacaaacacaaatacacacactaaattaata

>P9

gcggtgggcgccaattggtgcggtgggcgccaattggtgcggtgggcgccaattggtgcggtgggcgctcgagcagatccgcca  
ggcgtgtatataagcgtggatggccaggcaactttagtgctgacacatacaggcatatataatagtgtgacgacacatg  
atcatatggcatgcatgtgctctgtatgtatataaaactctgttttcttcttctctaaatattcttcttatacattaggaccttgc  
agcataaatactatacttctatagacacacaaacacaaatacacacactaaattaata

>P10

gcggtgggcgcaattggtgcggtgggcgccaattggtgcggtgggcgcaattggtgcggtgggcgccaattggtgcggtgggcgcca  
attggtgcggtgggcgccaattggtgcggtgggcgccaattggtgcggtgggcgctcgagcagatccgccaggcgtgtatata  
gcggtggatggccaggcaactttagtgctgacacatacaggcatatataatagtgtgacgacacatgatcatatggcatg  
catgtgctctgtatgtatataaaactctgttttcttcttctctaaatattcttcttatacattaggaccttgcagcataaatact  
atacttctatagacacacaaacacaaatacacacactaaattaata

>P11

agacgtgattacaagacatatacaggacccaaagaatggattcactcatgattttccattgaaaatcagatgattggc  
ctttcatttcttcttggcgccgcggtggcgcggtgggcgctagaaaaccaactgaaatttgatgattgccccctcaatta  
aagcgcagggtatcaaaacttcaacacacgctagtctgtgaaagtaaaggaagatctacgtgtgaagtatataatgtt  
ttaacctgggcggtcaattgtactttatataatgtgaaacaacagagaaagggcaggataaagaaagaatgactgc

agtttcctatgatcatatttcatttttgaattaacaatataataataacactataaacggttataaacagctttatctcagaaa  
agtcaggaatt

>P12

taaataactttagtgcggatcgtaacaatggctctataaggttggaccggtatgtaacctaatatggctgactcaaaacctgc  
tagatagttatccaaggcggccgcggtggggtgcgtggggtgcgtggggtgcgtggggtgcgtggggtgcgtggggtgcgtggg  
gtatcctttatcacattttacaatagtggttagctatcttttcatgttaggctcaccggtattctcatgcaagatcaaacaaaa  
aatggtaaagtttggactttacattgcttacagttgctttttatgaagattcaaaaagattatgtcctcggcggctaaatttccatt  
aataatattatcctttacgcgaccgaaaaagagaagcgttttaagagttgttctaacaataattaataaagctaactg  
aactgaccaggtctatttgaagat

>P13

tatggccaggaaaatacataaggtttcgccgaacgacggggtcaattcgtccttttgtacacatcgtttaattatgaggaaa  
aattgatgaatgatcgcgccgcggtggggtgcgtggggtgcgtggggtgcgtggggtgcgtggggtgcgtggggtgcgtggg  
gtctagactccgtagacgctcctctgaaaagttcatgttctcgcggtcctttgataggcaataaaacaatacaacgct  
gcctttgaaaatgccagatctatacagggccttaacaaaacatcgttcaggacagagaatgctagaaaatgcaaaaag  
ggtccctgggtactcattgaatagaaatgattgaaaatactcgtataaaatagcacgactaaatgatactattttatgtcga  
cacggtactatttcttctttcagataaaagtgtagcatactaaatataacccaagta

>P14

gtgtgagacgacatcatcagacatgattcagagtgacagattgatgtaatcaatttcctacctgaatctaaaattcccggga  
gcaagatcaagatgtgtgcacctacctgtcacgcggtggggtgcgtggggtgcgtggggtgcgtggggtgcgtggggtgcgtggg  
gtatagcgtggatggccaggcaactttagtgctgacacatacaggcatatataatgtgtgacgacacatgatcatatg  
gcatgatgtgctctgtatgtatataaaactctgttttcttcttctctaaatattcttcttatacattaggaccttgcagcataa  
attactatacttctatagacacacaaac

>P15

acggccggccaagcacgcggggataatgaactagattccgtgtgagacgacatcgtcgatactgatgtaatcaagttcct  
acctgaatctaagattcccgggagcaagatcaagatgtttcacacgatggcagaagcggccgcggtggggtgcgtggggtgcgtggg  
ggcgaaagcggtggggtgcggtggggtgcgtggggtgcgtggggtgcgtggggtgcgtggggtgcgtggggtgcgtggggtgcgtggg  
atcctcgagcagatccgacggcgtgtatataagcgtggatggccaggcaactttagtgctgacacatacaggcatatata  
atagtggtgacgacacatgatcatatggcatgcatgtgctctgtatgtatataaaactctgttttcttcttctctaaatattctt  
ccttatacattaggaccttgcagcataaattactatacttctatagacacacaaac

*Sequences of Artificial Transcription Factors (ATFs) along with promoter and terminator elements:*

>ACT1pr-Z<sub>3</sub>EV-ENO2term

gcctctaccttgcagaccatataataaactaaataaagtaaataagacacacgagcagaacatatacacaaattac  
agtaacaataacaagaggacagatactacaaaatgtgtggggaagcgggtaagctgccacagcaattaatgcacaa  
catttaacctacattcttctatcggtatcctcaaaacccttaaaaacatatacctcaccctaacatatttccaattaacctca  
atatttctctgacccggcctctatttccatttcttcttaccggccacgcttttttcttcaaatTTTTTcttcttcttcttcttca  
cgtcctcttgataaataaataaacggtttgaaaccaaactcgcctctctctccttttgaatatTTTTTgggtttggtgatcctt

ccttccaatctctctgtttaataataatcatttataatcagctctctttttatcttcttttttctctctctgtattcttcttccccttct  
actcaaaccaagaagaaaaagaaaaggtaaatcttggtaaagaataggatcttctactacatcagcttttagattttcagc  
cttactgctttttctccaagatcgaaaatttactgaattaacagggccccctcgaggctgacgggatcgataagcttga  
agcaagcctcctgaaagatgggtaccgcccataatgcttgccctgtcgagctctcgatcgccgcttttctcgctcggatga  
gcttaccgccaatccgcatccataccggtcagaagccctccagtgatcgaatctgcatgcgtaactcagctgtagtgac  
caccttaccaccacatccgacccacacaggcgagaagcccttgcctgtgacatttggggaggaagttgccaggagt  
gatgaacgcaagaggcataccaaaatccatacaggtggcggaggcacacctgcagctgctgactctagaggatcc  
atctgctggagacatgagagctccaaccttggccaagcccgtcatgatcaaacgctctaagaagaacagcctggcct  
tgccctgacggccgaccagatggcagtgcttggatgctgagccccatactctattccgagatgatcctaccaga  
ccctcagtgaaagcttcatgatgggcttactgaccaacctggcagacaggagctggttcacatgatcaactggcgaa  
gaggggtgccaggcttggattgacctccatgatcaggtccacctctagaatgtgcttggctagagatcctgatgattg  
tctcgtctggcgtccatggagcaccagtgaaagctactgttctcctaactgctcttggacaggaaccagggaaaatgt  
gtagagggcatggaggatcttcgacatgctgctgctacatcatctcggttccgcatgatgaatctgcaggagaggag  
ttgtgtgctcaaacttattttgcttaattctggagtgtacacatttctgtccagcacctgaagtctctggaagagaagga  
ccatatccaccgagctctggacaagatcacagacacttggatccacctgatggccaaggcaggcctgacctgcagcag  
cagcaccagcggctggccagctcctcctcatcctcccacatcaggcacatgagtaacaaaggcatggagcatctgta  
cagcatgaagtgaagaacgtgggtcccctctatgacctgctgctggagatgctggacgcccaccgctacatgcgccc  
actagccgtggaggggcatccgtggaggagacggaccaaaagccacttggccactgcgggctctactcatcggagctcc  
acttagacggcgaggacgtggcgtatggcgtatgacgacgctagacgattcgtatcggacatgttgggggacgggg  
attccccgggtccgggatttccccccacgactccgccccctacggcgtctggatggccgactcagagttgagcagat  
gtttaccgatgcccttgaattgacgagtagcgggtgggtagatccccgcgtgcttggccggccgtagtgctttaaactaagaatt  
attagcttttctgcttatttttcatcatagtttagaacactttatattaacgaatagttatgaatctatttaggttaaaaattgatac  
agttttataagttacttttcaaagactcgtgctgtctattgcataatgcactggaaggggaaaaaaagggtcacacgcgtg  
gcttttctgaaattgacgtttgaaaaataactacatggatgataagaaaacatggagtacagctcattgagaaccttcaat  
cagctggtaacgtcttctgtaattggatactcaaaaaagatggatagcatgaatcacaagatggaaggaaatgcccc  
acgaccacagtgatatgcatatgggagatggagatgatacctgttcgatgaatgatcttttctggtcatacaagaatac  
gtgtgctcttgaatggggcatatcaagacctgctggactgat

> CYC1pr-Z<sub>3</sub>(4S)EV-YPR052Cterm

ttgaaaaccaagaaatgaattatattccgtgtgagacgacatcgtcgaatatgattcagggtaacagattgatgtaatca  
atttctactgaatctaaaattcccgggagcaagatcaagatgtttaccgatcttccggctcttggccgggggttacgg  
acgatggcagaagaccaaagcgcagttcattggcgagcgttgggtggatcaagcccacgcgtaggcaatcctcg  
agcagatccgccaggcgtgtatatatagcgtggatggccaggcaactttagtctgacacatacaggcatatataatgtg  
gcgacaacacatgatcatatggcatgcatgtgctctgtatgtatataaaaactctgttttcttcttctctaaatattcttccctatac  
attaggaccttgcagcataaataactatacttctatagacacacaaacacaaatacacacactaaattaataacctcccgc  
gacctccaaaatcgaactaccttcacaatgggtactagaccatacgttgcagttgagcttgtgacagaagattctctag  
atccgacgaattaaccgctcacattagaattcactggtcaaaaaccttccaatgtagaatctgcatgagaaacttttctg  
ttctgatcactgactactcatatcagaaccacactggtgaaaaaccttgccttggatatttggtgtagaaaattcgccaga  
tctgatgaaagaaagcgtcacactaaaatccacactgggtgggtggtactccagctgctgctccaccttgaagacca  
tctgctggtagatgcgtgctgtaacttggcccttccattaatgatcaaaagatctaaaagaattcttggcttctgtctt  
actgctgatcaaatggttctgcttattagacgccgaaccaccaatttatactctgaatatgatcctactcgtccatttccgaa  
gcctctatgatgggttaattaccaacttgatggatagagaattagtcataatgattactgggccaagcgtgtcccagggtttg  
ttgatttaaccttacacgatcaagttcattgttggaaatgtgcttgggtgaaatcttgc aaatgggttgggttggagatccatgga  
acatccagttaaattattgtcgtcctaattgttgtggacagaaaccaaggtaagtgttgaaggatgggtgaaatttctg  
atatgttggctacttcttagattcagaatgatgaactgcaaggtaggaattcgttgggttgaatccattatcttgttgaat



tggtgtgaagaaacatgaaattgccagtttcttaacccaactgcacagaacaaaaacctgcaggaaacgaagataa  
atcatgtcgaagctacatataaggaacgtgctgctactcatcctagtctgtgctgccaagctattaatcatgcacgaa  
aagcaacaaactgtgtgcttcatggatgctgaccaccaaggaattactggagttagttgaagcattaggtcccaaat  
ttgttactaaaaacacatgtggatatcttgactgattttccatggagggcacagttaagccgctaaaggcattatccgcaa  
gtacaattttactctcgaagacagaaaattgctgacattggaatacagtcaaattgcagtactctgcggtgtatacaga  
atagcagaatgggcagacattacgaatgcacacgggtgtggggccaggtattgtagcggttgaagcaggcggcgg  
aagaagtaacaaaggaacctagaggcctttgatgtagcagaattgcatgcaagggtccctagctactggagaatata  
ctaagggtactgtgacattgcaagagtgacaaagattttgtatcggctttattgctcaaagagacatgggtggaagagat  
gaaggtacgattggtgattatgacaccgggtgtgggttagatgacaaggagacgcattgggtcaacagtatagaacc  
gtggatgatgtgctctacaggatctgacattattgttgaagaggactattgcaaaggaagggatgctaaggtag  
aggtgaaactgtacagaaaagcaggctgggaagcatatttgagaagatgcccagcaaaaactaaaaaactgtattat  
aagtaaagcatgtataactcacaattagagcttcaatttaattatcagttattaccacgaaaatcgttattgtcttga  
aggtgaaatttactcttattaatggtgaacgtaagctgatgctatgatggaagctgattggtcttaactgctgtcatctgtc  
aatggtcatatggctcgtgttattacttaagttattgtactcgtttgaaacgtaatgctaatagatcatcttatggaataatagta

*Sequence of GFP reporter:*

>GFP(Dasher)-Gal80term

atgacagcttaactgaagggccaagctttcgaaaaagagatcccatatataccgaactgaaggtgacgttgagggt  
atgaagttatcataaaaggagaaggcacaggtgatgcgacaacgggtacaatcaaggcaaagtacattgtacaactg  
gggacctgctgtcccatgggccactttggtgctactttgtcttacggcgtacaatgtttgctaagttaccctcacacatcaa  
gattctttaagtctgcaatgcctgaaggatacacacaggaacgtacaattcattgagggcgacggtgtctataaaaca  
gagctatggttacttatgaaagaggtccatctacaacagagtgacactaacgggcgaaaattcaaaaaggatggacat  
atgttcgtaaaaacgtagctttccaatgccaccatcaatactatacattctgccagatactgtaacaatggtattagagtc  
gagttaatcaagcttatgatatagaaggtgctactgaaaaattggttacaanaatgcagccaaatgaatagaccattggca  
ggatctgccgctgtgcataccctagataccatcacattacctaccacaccaaattaagtaagacagggatgaacgaag  
agatcatatgtgttagttgaggtgttaaggcagttgatctcgacacttaccataaaagcatctgcccgtgcttgccccc  
agtcagcgaacgttataaaaacgaatactgagtatatactatgtaaaacaaccatatcatttctgtctgaactttgttacc  
taactagtttaaatcccttttctgcatgcccgtgttctatttattagcactacattgaaatatcaaatcccttagtagaaa  
agtgagagaaggtgactgacaca

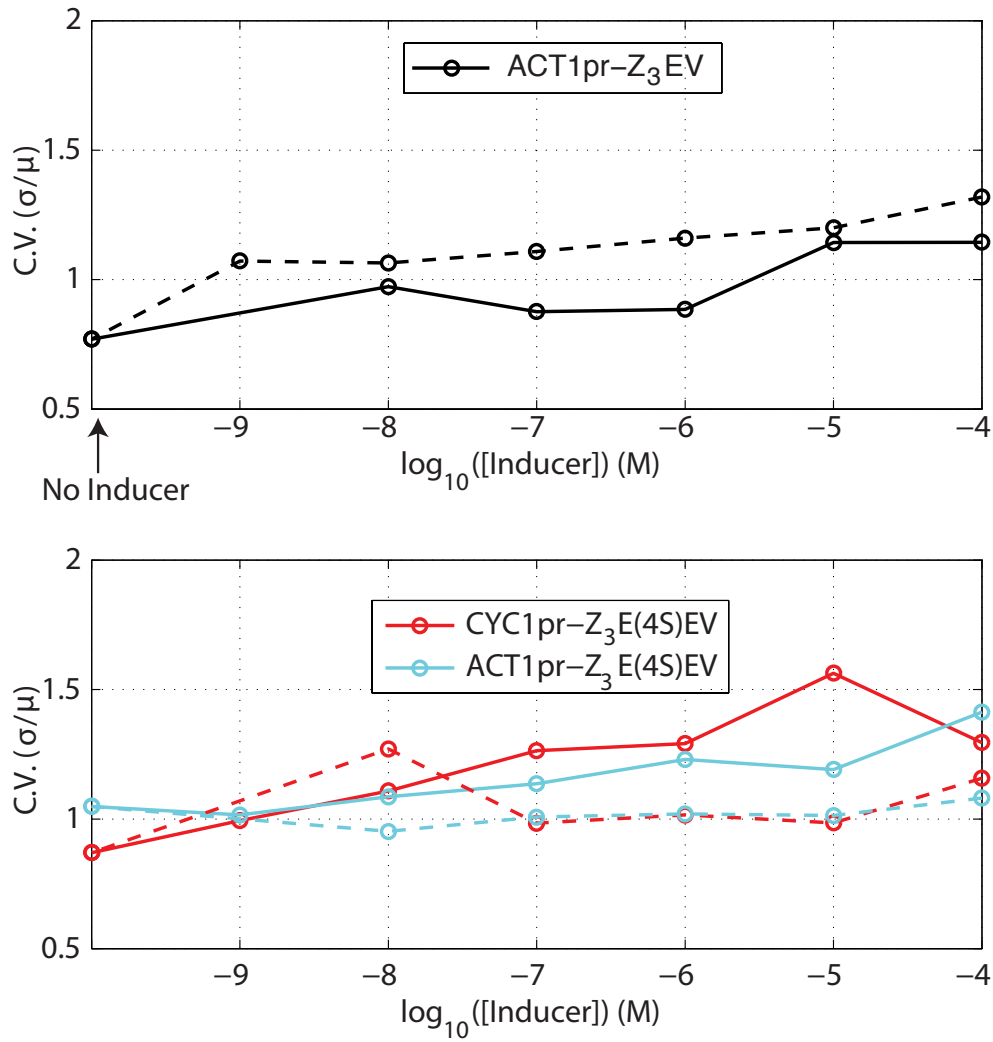

**Figure S1: The coefficient of variation (C.V.) of GFP expression in a strain containing Z<sub>3</sub>EV (top) or Z<sub>3</sub>E(4S)V (bottom) in the presence of  $\beta$ -estradiol (solid lines) or DHB (dashed line).**



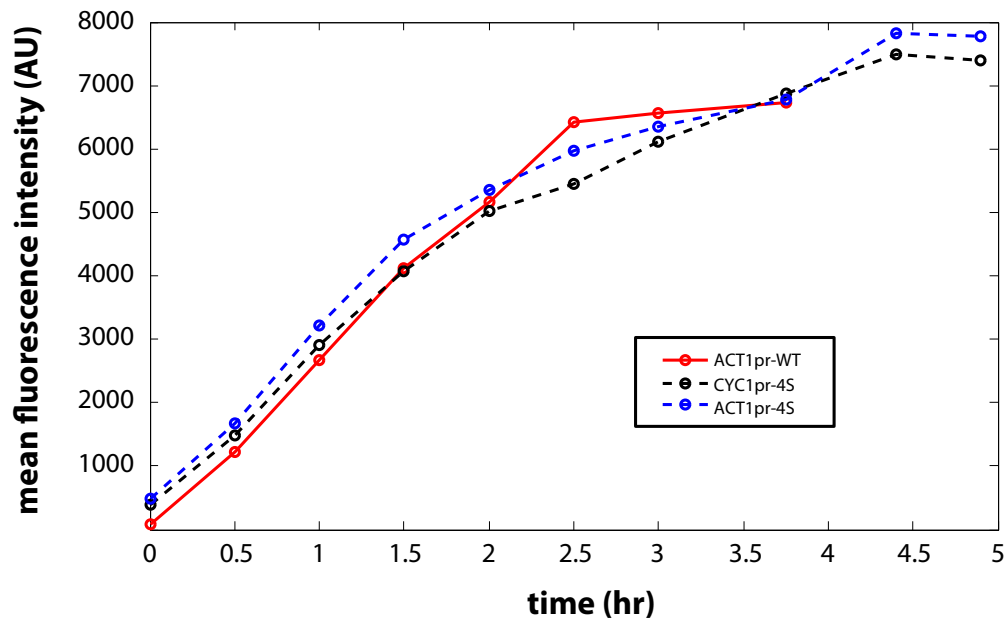

**Figure S2: Induction of GFP by ACT1pr-Z<sub>3</sub>E<sub>3</sub>V (red), CYC1pr- Z<sub>3</sub>E(4S)V (black), or ACT1pr- Z<sub>3</sub>E(4S)V as function of time. ACT1pr-Z<sub>3</sub>E<sub>3</sub>V was induced with 1  $\mu$ M  $\beta$ -estradiol. CYC1pr- Z<sub>3</sub>E(4S)V and ACT1pr- Z<sub>3</sub>E(4S)V were induced with 1  $\mu$ M DHB.**
